# Supplementary material for: Engineered Curli Nanofilaments as a Self‐Adjuvanted Antigen Delivery Platform
Source: PubMed Central journal article supplement (PMC11468023; doi:10.1002/adhm.202300224), 2023-04-29
Supplement: ADHM-12-2300224-s001.pdf [file ADHM-12-2300224-s001.pdf]

# ADVANCED HEALTHCARE MATERIALS

## Supporting Information

for *Adv. Healthcare Mater.*, DOI 10.1002/adhm.202300224

Engineered Curli Nanofilaments as a Self-Adjuvanted Antigen Delivery Platform

*Félix Lamontagne, Dominic Arpin, Mélanie Côté-Cyr, Vinay Khatri, Philippe St-Louis, Laurie Gauthier, Denis Archambault\* and Steve Bourgault\**

# Supporting Information

## Engineered Curli Nanofilaments as a Self-Adjuvanted Antigen Delivery Platform

Félix Lamontagne, Dominic Arpin, Mélanie Côté-Cyr, Vinay Khatri, Philippe St-Louis, Laurie Gauthier, Denis Archambault\*, Steve Bourgault\*

\*Corresponding authors:

**Denis Archambault**, C.P. 8888, Succursale Centre-Ville, Montreal, H3C 3P8, Canada; e-mail address: [archambault.denis@uqam.ca](mailto:archambault.denis@uqam.ca)

**Steve Bourgault**, C.P. 8888, Succursale Centre-Ville, Montreal, H3C 3P8, Canada; e-mail address: [bourgault.steve@uqam.ca](mailto:bourgault.steve@uqam.ca)

## **Table of contents**

|                                                                                |    |
|--------------------------------------------------------------------------------|----|
| Figure S1. Flow chart of the preparation of CsgA-based nanovaccines.....       | 3  |
| Figure S1. SDS-PAGE analysis of purified proteins.....                         | 4  |
| Figure S2. Representative TEM images of 3M2e-CsgA and 3M2e-R4R5 assemblies...  | 5  |
| Figure S3. Representative AFM images of 3M2e-CsgA and 3M2e-R4R5 assemblies...  | 6  |
| Figure S4. Length distribution of 3M2e-R4R5 nanofilaments.....                 | 7  |
| Figure S5. Assessment of solution viscosity by tube inversion.....             | 8  |
| Figure S6. SDS-PAGE analysis of purified eGFP-R4R5.....                        | 9  |
| Figure S7. Representative TEM image of assembled eGFP-R4R5.....                | 10 |
| Figure S8. eGFP-R4R5 assemblies activate TLR2-TLR1.....                        | 11 |
| Figure S9. Cellular uptake by DC2.4 dendritic cells.....                       | 12 |
| Figure S10. Cellular uptake by J774.A1 macrophages.....                        | 13 |
| Figure S11. Flow cytometry analysis of cell uptake by DC2.4 cells.....         | 14 |
| Figure S12. Flow cytometry analysis of cell uptake by J774.A1 macrophages..... | 15 |
| Table S1. Scale for clinical symptoms after IAV infection.....                 | 16 |

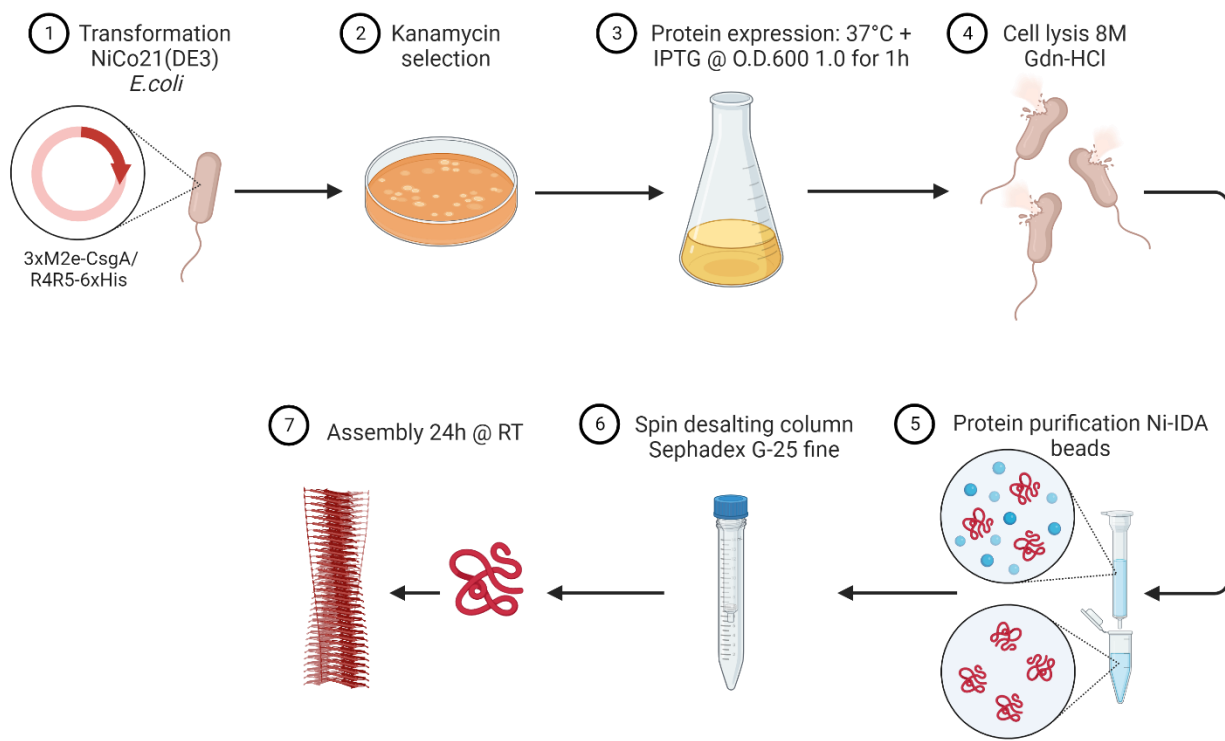

**Figure S1.** Flow chart summarizing the preparation of CsgA-based nanovaccines.

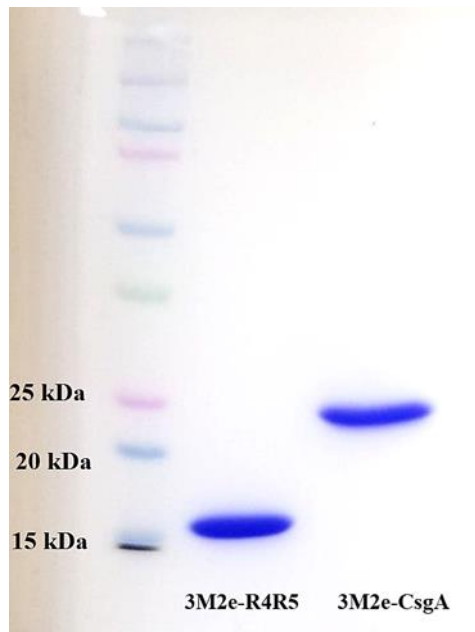

**Figure S2.** Coomassie Blue stained SDS-PAGE analysis of purified 3M2e-R4R5 and 3M2e-CsgA proteins.

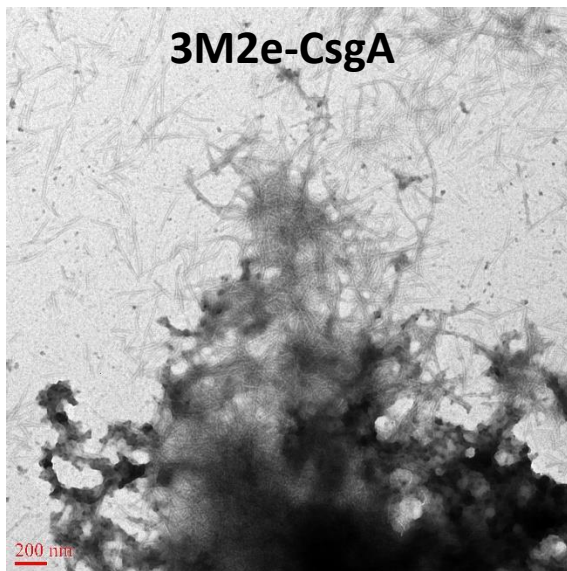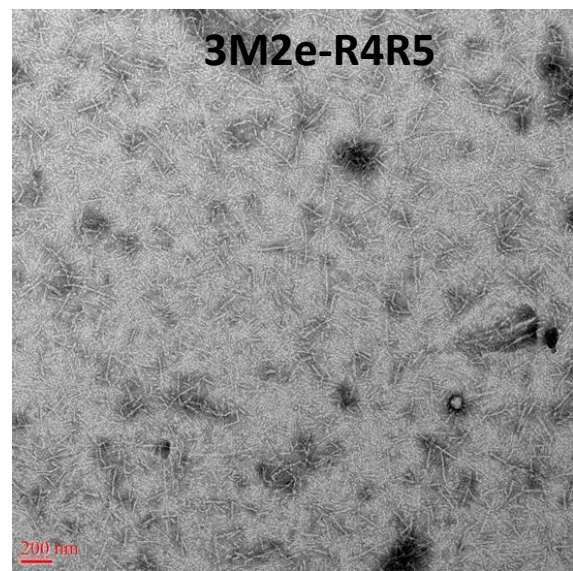

**Figure S3.** Representative TEM negatively stained images of aggregates formed by the assembly of 3M2e-CsgA and 3M2e-R4R5. Proteins were assembled in PBS for 24 h at room temperature at a concentration of 600  $\mu\text{g/ml}$  under fully quiescent conditions.

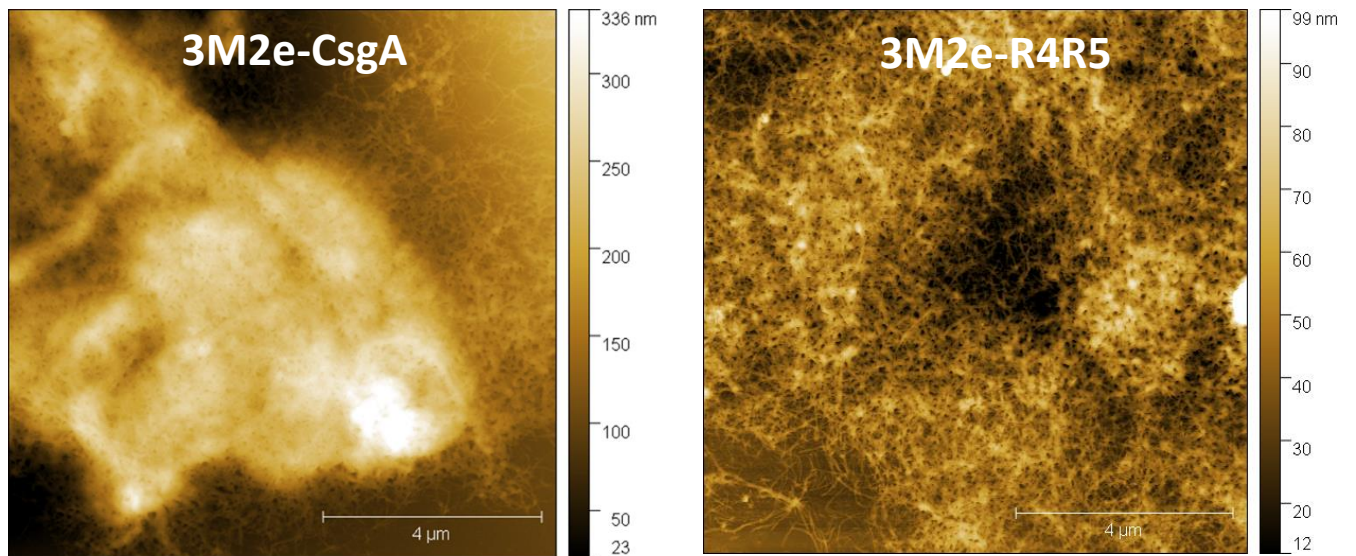

**Figure S4.** Representative AFM images of aggregates formed by the assembly of 3M2e-CsgA and 3M2e-R4R5. Proteins were assembled in PBS for 24 h at room temperature at a concentration of 600 μg/ml under fully quiescent conditions.

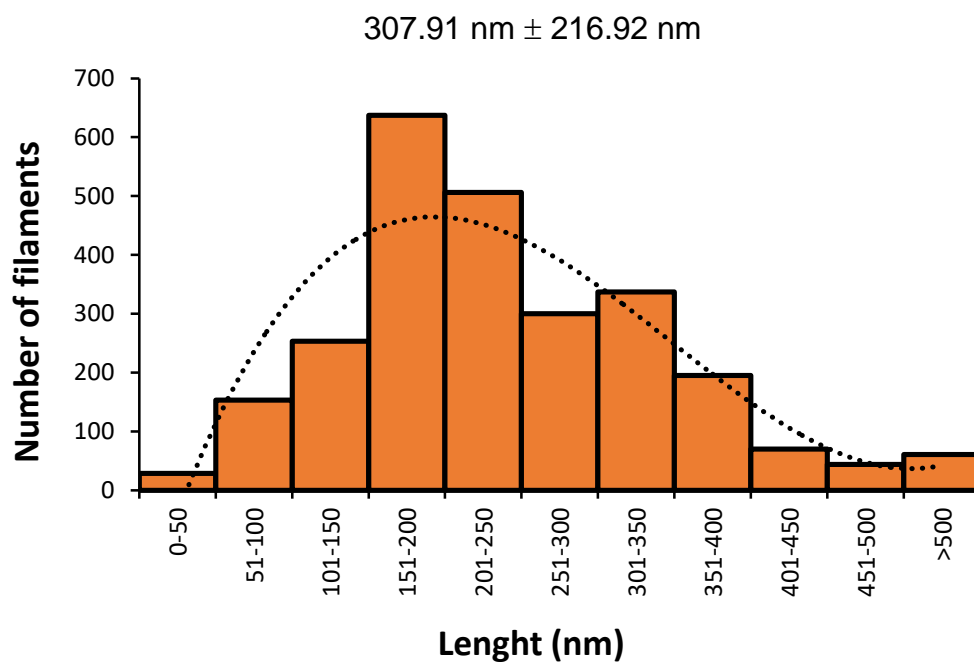

**Figure S5.** Length distribution of 3M2e-R4R5 nanofilaments extracted from the analysis of transmission electron microscopy images.



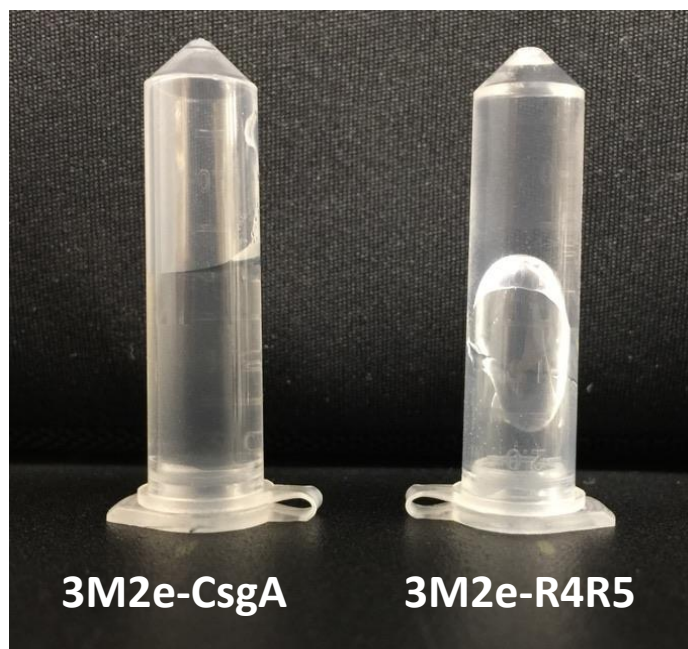

**Figure S6.** Assessment of solution viscosity by tube inversion of assembled 3M2e-CsgA and 3M2e-R4R5. Proteins were assembled in sterile PBS for 24 h at room temperature at a concentration of 600  $\mu\text{g/ml}$  under fully quiescent conditions.

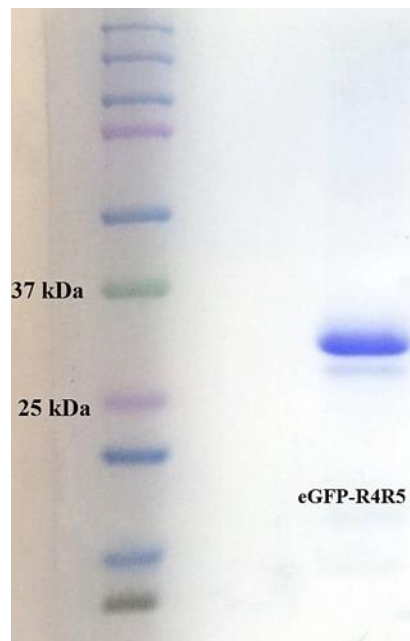

**Figure S7.** Coomassie Blue stained SDS-PAGE analysis of purified eGFP-R4R5.

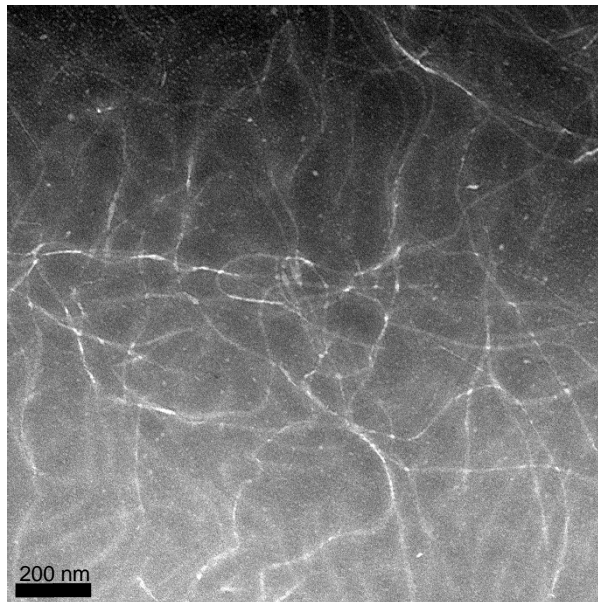

**Figure S8.** Representative TEM image of assembled eGFP-R4R5. eGFP-R4R5 chimeric protein was assembled for 24 h in PBS at a concentration of 600  $\mu\text{g/ml}$  under quiescent conditions and room temperature.

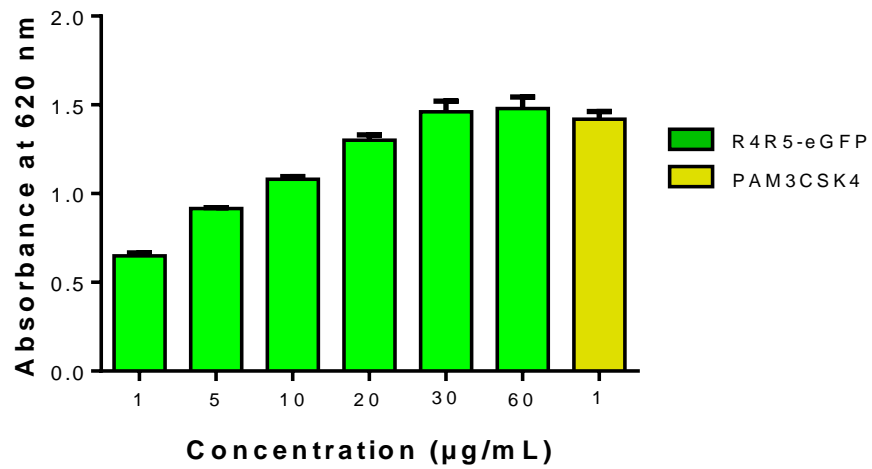

**Figure S9.** eGFP-R4R5 assemblies activate TLR2-TLR1. HEK-Blue cells expressing the heterodimer TLR2-TLR1 were exposed to nanofilaments for 16 h and activation was measured using SEAP reporter.

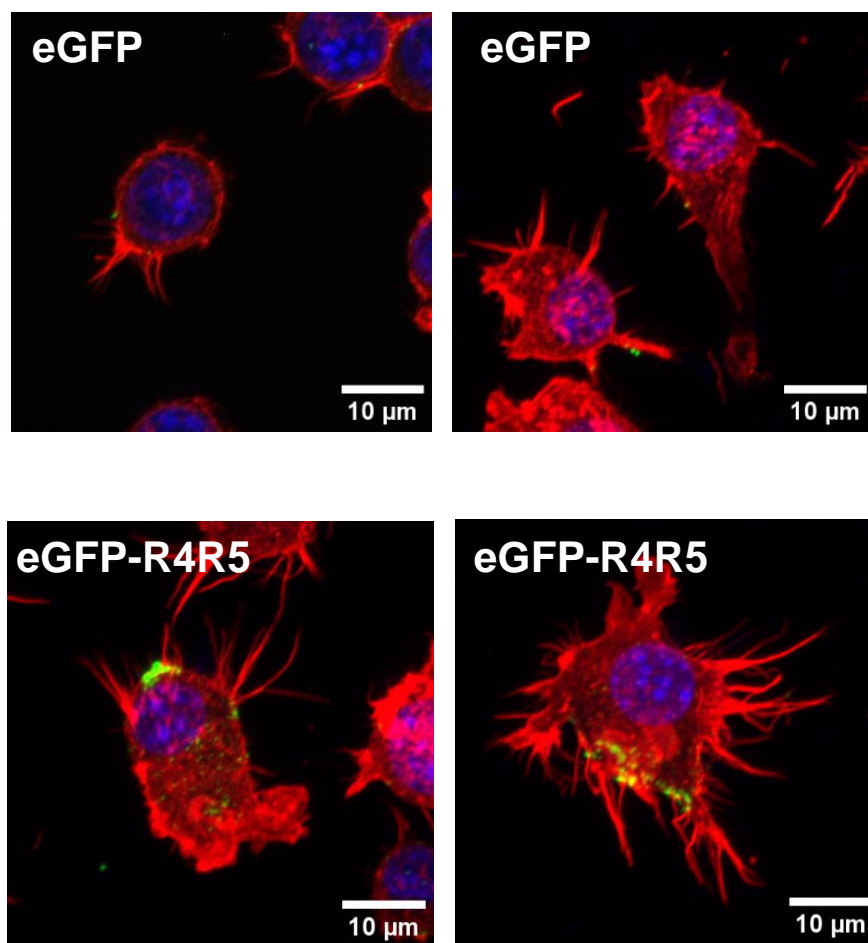

**Figure S10.** Cellular uptake by DC2.4 dendritic cells. DC.2.4. cells were treated 30  $\mu\text{g}/\text{mL}$  for 3 h with eGFP or eGFP-R4R5 nanofilaments followed by extensive washing before imaging by confocal fluorescence microscopy.

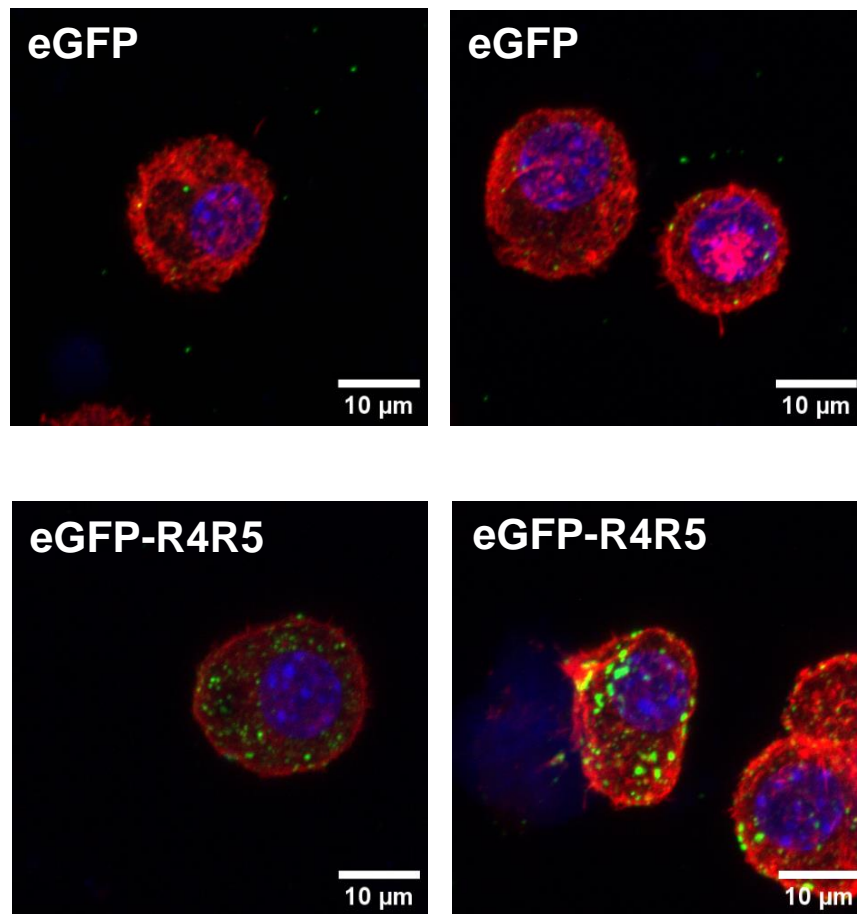

**Figure S11.** Cellular uptake by J774.A1 macrophages. J774.A1 cells were treated 30  $\mu\text{g}/\text{mL}$  for 3 h with eGFP or eGFP-R4R5 nanofilaments followed by extensive washing before imaging by confocal fluorescence microscopy.

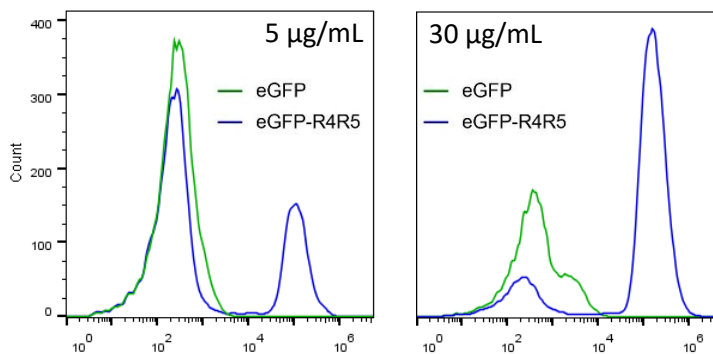

**Figure S12.** Flow cytometry analysis of cell uptake by DC2.4 cells. Representative flow cytometry histograms showing the internalization of 5 and 30 µg/mL of eGFP and eGFP-R4R5 nanofilaments after 3 h incubation at 37°C.

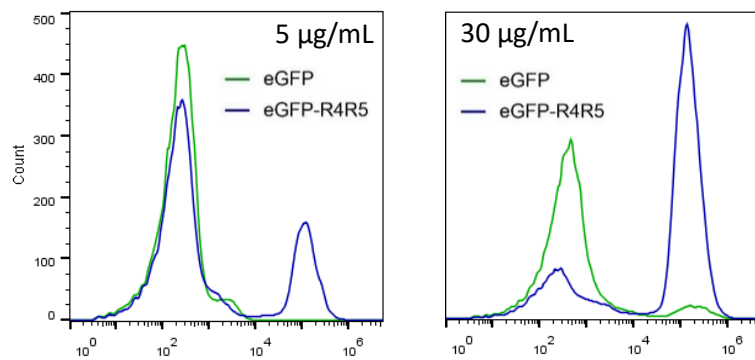

**Figure S13.** Flow cytometry analysis of cell uptake by J774.A1 macrophages. Representative flow cytometry histograms showing the internalization of 5 and 30 µg/mL of eGFP and eGFP-R4R5 nanofilaments after 3 h incubation at 37°C.



**Table S1.** Scale for clinical symptoms after IAV infection.

| <b>Intensity</b>    | <b>Temperature (°C)</b> | <b>Fur</b>      | <b>Posture</b>        | <b>Eyes</b> | <b>Ears</b> | <b>Response to stimuli</b> | <b>Activity</b>    | <b>Feces</b> | <b>Dehydration (Pinch on the skin)</b> |
|---------------------|-------------------------|-----------------|-----------------------|-------------|-------------|----------------------------|--------------------|--------------|----------------------------------------|
| <b>0 (Absent)</b>   | > 36                    | Smooth and even | Normal                | Open        | Normal      | Normal                     | Normal             | Normal       | Normal                                 |
| <b>1 (Light)</b>    | 35-36                   | Fur loss        | Slightly hunched back | Half-closed | Bent        | Calm, curious              | Reduced            | Soft         | Skin rapidly recovers                  |
| <b>2 (Moderate)</b> | 32-35                   |                 |                       |             |             | Delay in response          | Immobile, reactive | Sticky       | Skin slowly recovers                   |
| <b>3 (Severe)</b>   | < 32                    | Ruffled fur     | Hunched back          | Closed      | Laid down   | Inactive                   | Lethargic          | Liquid       | No recovery                            |
